# Supplementary material for: Theoretical-Computational Modeling of Gas-State Thermodynamics in Flexible Molecular Systems: Ionic Liquids in the Gas Phase as a Case Study
Source: MDPI journal article supplement (doi:10.3390/molecules27227863), 2022-11-14
Supplement: s1 [file s1]

Supplementary Information for  
Theoretical-computational modeling of gas-state thermodynamics in flexible molecular systems.

Andrea Amadei<sup>1</sup>, Andrea Ciccioli<sup>2</sup>, Antonello Filippi<sup>3</sup>, Caterina Fraschetti<sup>3</sup>, Massimiliano Aschi<sup>4</sup>.

<sup>1</sup> Dipartimento di Scienze e Tecnologie Chimiche, Università di Roma "Tor Vergata", via della Ricerca Scientifica 1, 00133 Roma, Italia. E-mail: andrea.amadei@uniroma2.it

<sup>2</sup> Dipartimento di Chimica Università di Roma, "La Sapienza", P.le A. Moro 5, 00185, Roma, Italia.

<sup>3</sup> Dipartimento di Chimica e Tecnologie del Farmaco, Università di Roma, "La Sapienza", P.le A. Moro 5, 00185, Roma, Italia.

<sup>4</sup> Dipartimento di Scienze Fisiche e Chimiche Università de l'Aquila, via Vetoio (Coppito 2), 67010 l'Aquila, Italia. E-mail: massimiliano.aschi@univaq.it \\\

CARTESIAN COORDINATES AND HARMONIC FREQUENCIES FOR THE REFERENCE  
STRUCTURES.

A. n-Butane

|   |           |           |           |
|---|-----------|-----------|-----------|
| C | -0.001648 | -0.000290 | -0.002466 |
| C | 0.000388  | 0.004657  | 1.527897  |
| C | 1.407854  | 0.002101  | 2.123825  |
| C | 1.410962  | 0.010600  | 3.653440  |
| H | 0.508555  | -0.888929 | -0.393765 |
| H | -1.022625 | 0.003105  | -0.400676 |
| H | 0.515653  | 0.882155  | -0.398114 |
| H | -0.550569 | -0.871304 | 1.895722  |
| H | -0.543947 | 0.887842  | 1.889673  |
| H | 1.959296  | 0.876652  | 1.752529  |
| H | 1.952352  | -0.881245 | 1.762793  |
| H | 0.902868  | 0.901151  | 4.042808  |
| H | 0.895586  | -0.870688 | 4.053283  |
| H | 2.432262  | 0.010444  | 4.051563  |
|   |           |           |           |
|   | 79.3188   | 208.3782  | 241.5775  |
|   | 270.9190  | 435.0218  | 727.6941  |
|   | 818.7353  | 862.4816  | 971.9417  |
|   | 997.9461  | 1039.5837 | 1088.4457 |
|   | 1187.8102 | 1217.1879 | 1304.9826 |
|   | 1336.8318 | 1346.1739 | 1419.5738 |
|   | 1442.7100 | 1444.8725 | 1508.2351 |
|   | 1511.8804 | 1526.3355 | 1528.3633 |
|   | 1528.9665 | 1530.8861 | 3047.5502 |
|   | 3053.9091 | 3057.4988 | 3059.5429 |
|   | 3076.0776 | 3097.8843 | 3130.9193 |
|   | 3133.2365 | 3135.3277 | 3135.9010 |

B-Bmim-Ntf2

|   |          |           |          |
|---|----------|-----------|----------|
| H | 0.719022 | -2.602775 | 3.938409 |
|---|----------|-----------|----------|

|   |           |           |           |
|---|-----------|-----------|-----------|
| C | 0.462336  | -1.828495 | 3.213095  |
| H | 0.777268  | -0.850852 | 3.574952  |
| H | -0.611578 | -1.806997 | 3.019428  |
| N | 1.146791  | -2.106589 | 1.953663  |
| C | 1.079055  | -3.284653 | 1.246568  |
| H | 0.543278  | -4.142071 | 1.620230  |
| C | 1.732976  | -3.080196 | 0.073699  |
| H | 1.873302  | -3.725634 | -0.778168 |
| N | 2.191754  | -1.783315 | 0.081812  |
| C | 1.818402  | -1.214657 | 1.227143  |
| H | 1.986045  | -0.188827 | 1.513157  |
| C | 2.773457  | -1.078546 | -1.070606 |
| H | 3.190292  | -1.852380 | -1.721381 |
| H | 1.943009  | -0.589354 | -1.587616 |
| C | 3.843152  | -0.071290 | -0.672875 |
| H | 3.398014  | 0.702236  | -0.037320 |
| H | 4.632829  | -0.572939 | -0.097043 |
| C | 4.442069  | 0.604627  | -1.907847 |
| H | 4.884550  | -0.155185 | -2.566458 |
| H | 3.636123  | 1.085985  | -2.475425 |
| C | 5.499411  | 1.644138  | -1.540267 |
| H | 6.327800  | 1.187687  | -0.985388 |
| H | 5.915794  | 2.115983  | -2.435977 |
| H | 5.069155  | 2.434010  | -0.914373 |
| F | -4.120687 | -0.583635 | -0.562882 |
| C | -3.097284 | -1.005394 | -1.297688 |
| F | -3.013260 | -0.266125 | -2.398751 |
| F | -3.311910 | -2.276102 | -1.647507 |
| S | -1.506919 | -0.941449 | -0.330800 |
| O | -0.458859 | -1.382092 | -1.251368 |
| O | -1.729734 | -1.779213 | 0.847377  |
| N | -1.512004 | 0.624716  | -0.032063 |
| S | -0.257322 | 1.384680  | 0.573066  |
| O | 0.928992  | 1.417432  | -0.286673 |
| O | 0.007556  | 1.093764  | 1.986444  |
| C | -0.968837 | 3.104650  | 0.532684  |
| F | -1.260401 | 3.467483  | -0.711561 |
| F | -0.046890 | 3.937507  | 1.020556  |
| F | -2.061839 | 3.185930  | 1.282716  |

|          |          |          |
|----------|----------|----------|
| 14.0705  | 22.0231  | 28.2414  |
| 30.2306  | 38.2946  | 49.0133  |
| 53.7311  | 55.4921  | 60.9179  |
| 73.1392  | 81.9690  | 89.0281  |
| 101.6357 | 122.6548 | 126.0593 |
| 133.0437 | 156.0889 | 186.1345 |
| 200.6493 | 209.3442 | 221.7297 |
| 248.9035 | 255.2858 | 274.9758 |
| 276.6769 | 284.7572 | 292.8033 |
| 319.2194 | 326.0345 | 331.1838 |
| 345.1022 | 395.6511 | 410.6019 |
| 477.2316 | 494.6744 | 497.9458 |

|           |           |           |
|-----------|-----------|-----------|
| 525.4832  | 543.9042  | 558.0150  |
| 569.2996  | 570.6607  | 581.1723  |
| 632.7245  | 637.3903  | 667.9065  |
| 677.1605  | 740.1096  | 746.6574  |
| 755.0890  | 774.4654  | 776.2657  |
| 799.7804  | 816.4386  | 856.3454  |
| 869.5507  | 933.5158  | 973.0709  |
| 1049.6492 | 1060.4682 | 1066.8488 |
| 1069.0717 | 1092.8513 | 1127.3470 |
| 1137.8429 | 1144.7548 | 1147.4243 |
| 1153.5023 | 1168.8293 | 1188.5059 |
| 1205.4991 | 1223.6885 | 1241.1228 |
| 1246.6428 | 1249.1039 | 1252.1726 |
| 1255.5478 | 1273.1294 | 1293.9269 |
| 1300.9051 | 1320.3927 | 1322.3260 |
| 1351.3157 | 1369.8160 | 1394.2410 |
| 1408.3203 | 1443.2033 | 1448.2006 |
| 1463.2477 | 1477.4357 | 1487.6473 |
| 1511.0343 | 1519.7621 | 1520.9757 |
| 1528.0618 | 1531.4689 | 1536.8607 |
| 1542.6862 | 1645.4331 | 1652.1379 |
| 3054.2805 | 3059.8179 | 3061.7033 |
| 3098.4805 | 3105.2765 | 3105.6601 |
| 3127.0198 | 3137.5264 | 3145.5719 |
| 3167.8440 | 3199.4160 | 3222.5203 |
| 3327.3194 | 3344.7300 | 3348.9155 |

# C-Bmim-PF6

|   |           |           |          |
|---|-----------|-----------|----------|
| P | 0.000000  | 0.000000  | 0.000000 |
| N | 0.000000  | 0.000000  | 4.280100 |
| C | 1.101072  | 0.000000  | 3.532654 |
| N | 1.749513  | 1.147364  | 3.711379 |
| C | 1.043635  | 1.909395  | 4.617210 |
| C | -0.054657 | 1.191044  | 4.971603 |
| H | 1.376066  | 2.889892  | 4.919219 |
| H | -0.866667 | 1.425984  | 5.641078 |
| H | 1.354056  | -0.753294 | 2.799895 |
| C | 2.930212  | 1.556553  | 2.953427 |
| H | 2.872049  | 2.631198  | 2.779295 |
| H | 3.838260  | 1.313189  | 3.508925 |
| H | 2.910256  | 1.046547  | 1.988931 |
| C | -1.070186 | -1.004696 | 4.199073 |
| H | -0.671779 | -1.839495 | 3.618927 |
| H | -1.274004 | -1.348806 | 5.217318 |
| C | -2.308710 | -0.431754 | 3.511760 |
| H | -2.000137 | -0.022875 | 2.545510 |
| H | -2.721175 | 0.390344  | 4.112690 |
| C | -3.383732 | -1.498037 | 3.284484 |
| H | -2.954983 | -2.315371 | 2.691390 |
| H | -4.168913 | -1.051925 | 2.664783 |
| C | -4.003109 | -2.052540 | 4.569056 |
| H | -3.279762 | -2.619779 | 5.167314 |

|   |           |           |           |
|---|-----------|-----------|-----------|
| H | -4.398065 | -1.244426 | 5.197549  |
| H | -4.831992 | -2.730163 | 4.340551  |
| F | 1.620960  | -0.059227 | 0.352796  |
| F | 0.261095  | 1.168708  | -1.081326 |
| F | 0.186841  | -1.147889 | -1.118160 |
| F | -1.601707 | 0.051464  | -0.240530 |
| F | -0.153881 | 1.131630  | 1.206539  |
| F | -0.225783 | -1.176311 | 1.163065  |

|           |           |           |
|-----------|-----------|-----------|
| 12.4086   | 23.2212   | 24.7906   |
| 35.9408   | 48.4829   | 64.4506   |
| 68.4948   | 76.1625   | 89.9347   |
| 120.5067  | 136.7117  | 213.5185  |
| 231.8388  | 281.5991  | 288.1203  |
| 292.9492  | 296.8378  | 308.8814  |
| 357.3229  | 422.5609  | 443.5078  |
| 445.3253  | 446.9139  | 451.9971  |
| 533.2437  | 534.2095  | 537.2620  |
| 557.0099  | 563.8114  | 634.7047  |
| 644.8216  | 676.9883  | 710.7068  |
| 747.0933  | 750.9376  | 777.2834  |
| 808.9460  | 860.1011  | 872.1006  |
| 878.0748  | 887.6488  | 888.5233  |
| 907.3145  | 975.9333  | 1002.0893 |
| 1058.6034 | 1063.1107 | 1104.5647 |
| 1128.1616 | 1141.0907 | 1144.8075 |
| 1167.5587 | 1173.6932 | 1214.5340 |
| 1251.1710 | 1309.6127 | 1323.2143 |
| 1353.2622 | 1368.9135 | 1401.9884 |
| 1404.6677 | 1434.0887 | 1449.0205 |
| 1456.2849 | 1488.1578 | 1493.1544 |
| 1517.3190 | 1521.3163 | 1524.5662 |
| 1531.9201 | 1533.1928 | 1536.1676 |
| 1538.8289 | 1641.1654 | 1653.4527 |
| 3054.6911 | 3060.3790 | 3076.4921 |
| 3101.0415 | 3106.8390 | 3111.5784 |
| 3133.3679 | 3140.9191 | 3156.6853 |
| 3179.9726 | 3197.2893 | 3211.1959 |
| 3317.5534 | 3322.6743 | 3341.2591 |

#### D-n-Butanol

|   |           |           |          |
|---|-----------|-----------|----------|
| C | 0.000000  | 0.000000  | 0.000000 |
| C | 0.000000  | 0.000000  | 1.525432 |
| C | 1.408438  | 0.000000  | 2.114249 |
| C | 1.437439  | 0.000000  | 3.637324 |
| O | 0.831559  | -1.145123 | 4.211329 |
| H | 1.297620  | -1.928068 | 3.908987 |
| H | 0.871097  | 0.848964  | 4.028092 |
| H | 2.472142  | 0.103640  | 3.992833 |
| H | 1.967016  | -0.870828 | 1.741090 |
| H | 1.959118  | 0.881527  | 1.760684 |
| H | -0.549333 | -0.868656 | 1.900376 |

|   |           |           |           |
|---|-----------|-----------|-----------|
| H | -0.539647 | 0.880895  | 1.893827  |
| H | 0.504773  | -0.886907 | -0.396551 |
| H | -1.017301 | 0.006779  | -0.400199 |
| H | 0.518587  | 0.878170  | -0.397796 |

|           |           |           |
|-----------|-----------|-----------|
| 83.3902   | 145.6122  | 240.8250  |
| 252.0669  | 315.1270  | 348.7679  |
| 534.4322  | 753.0400  | 846.1837  |
| 864.4555  | 974.0008  | 981.8150  |
| 1063.5126 | 1105.5167 | 1122.3218 |
| 1155.2726 | 1239.3557 | 1294.4003 |
| 1339.7672 | 1353.0592 | 1394.7320 |
| 1425.9711 | 1434.2570 | 1438.1927 |
| 1499.7208 | 1514.0478 | 1522.5365 |
| 1525.9484 | 1528.5654 | 3006.7533 |
| 3020.0361 | 3038.4513 | 3044.4326 |
| 3056.9422 | 3089.4318 | 3107.7379 |
| 3113.3220 | 3117.2117 | 3864.4118 |

#### E-Octadecane

|   |            |           |           |
|---|------------|-----------|-----------|
| C | 10.819503  | -0.146671 | 0.544642  |
| C | 9.562361   | 0.519980  | -0.018522 |
| C | 8.300377   | -0.322850 | 0.174615  |
| C | 7.030875   | 0.346110  | -0.355897 |
| C | 5.753135   | -0.441586 | -0.051790 |
| C | 4.472679   | 0.360325  | -0.288665 |
| C | 3.196505   | -0.437080 | -0.017515 |
| C | 1.916115   | 0.374621  | -0.218974 |
| C | 0.639160   | -0.432082 | 0.024283  |
| C | -0.637527  | 0.403185  | -0.087208 |
| C | -1.918315  | -0.424775 | 0.020647  |
| C | -3.196835  | 0.409099  | -0.083258 |
| C | -4.467251  | -0.438289 | -0.227387 |
| C | -5.732164  | 0.278917  | 0.253324  |
| C | -7.025982  | -0.356683 | -0.255854 |
| C | -8.289204  | 0.327651  | 0.267579  |
| C | -9.582418  | -0.345092 | -0.196033 |
| C | -10.836944 | 0.303623  | 0.387790  |
| H | 10.628376  | -0.566292 | 1.540121  |
| H | 11.657341  | 0.554653  | 0.617453  |
| H | 11.137010  | -0.981612 | -0.092462 |
| H | 9.411462   | 1.487763  | 0.480312  |
| H | 9.705103   | 0.742600  | -1.084480 |
| H | 8.430236   | -1.303892 | -0.306562 |
| H | 8.174354   | -0.522310 | 1.248638  |
| H | 7.117052   | 0.506650  | -1.439851 |
| H | 6.947042   | 1.346897  | 0.094179  |
| H | 5.733585   | -1.359312 | -0.657198 |
| H | 5.774176   | -0.768698 | 0.998037  |
| H | 4.457459   | 0.727446  | -1.325586 |
| H | 4.485164   | 1.253965  | 0.352235  |
| H | 3.174312   | -1.319155 | -0.674028 |

|   |            |           |           |
|---|------------|-----------|-----------|
| H | 3.222298   | -0.822641 | 1.012469  |
| H | 1.930257   | 1.242881  | 0.456098  |
| H | 1.898045   | 0.781499  | -1.240719 |
| H | 0.683685   | -0.894794 | 1.021206  |
| H | 0.593765   | -1.261597 | -0.696436 |
| H | -0.638045  | 0.934987  | -1.049996 |
| H | -0.634429  | 1.179936  | 0.691650  |
| H | -1.925512  | -0.978534 | 0.970273  |
| H | -1.916522  | -1.184366 | -0.775980 |
| H | -3.279207  | 1.038993  | 0.815241  |
| H | -3.123832  | 1.102907  | -0.932381 |
| H | -4.584713  | -0.736530 | -1.278606 |
| H | -4.353076  | -1.373630 | 0.339939  |
| H | -5.700607  | 1.327114  | -0.081116 |
| H | -5.737136  | 0.310006  | 1.351712  |
| H | -7.028409  | -0.337154 | -1.355281 |
| H | -7.045744  | -1.418843 | 0.031643  |
| H | -8.292773  | 1.381423  | -0.047433 |
| H | -8.263828  | 0.337545  | 1.367689  |
| H | -9.629065  | -0.315279 | -1.293871 |
| H | -9.557203  | -1.408217 | 0.080139  |
| H | -10.849812 | 1.382094  | 0.188587  |
| H | -10.874349 | 0.173690  | 1.476469  |
| H | -11.750876 | -0.130612 | -0.032772 |

|           |           |           |
|-----------|-----------|-----------|
| 11.6062   | 17.3172   | 25.5617   |
| 28.9937   | 41.9488   | 56.3556   |
| 59.9870   | 73.2919   | 81.1435   |
| 96.5199   | 101.1474  | 113.4075  |
| 128.8710  | 131.9298  | 137.3766  |
| 147.8918  | 152.4178  | 158.6427  |
| 166.0721  | 171.2248  | 210.1566  |
| 218.5228  | 249.6858  | 251.9066  |
| 271.0117  | 339.8667  | 358.3587  |
| 408.4239  | 441.5822  | 470.3655  |
| 498.4694  | 523.1172  | 534.2871  |
| 731.4082  | 737.2966  | 739.6819  |
| 742.0207  | 745.8257  | 756.3896  |
| 772.2745  | 794.6797  | 820.9070  |
| 854.2841  | 889.1551  | 916.5935  |
| 920.1670  | 923.8756  | 960.6966  |
| 990.0893  | 1004.6442 | 1012.5850 |
| 1022.2285 | 1023.6182 | 1043.3694 |
| 1046.2320 | 1056.4065 | 1064.0010 |
| 1076.1314 | 1080.8322 | 1087.3870 |
| 1093.0398 | 1093.9036 | 1095.3266 |
| 1098.5073 | 1098.9391 | 1104.6147 |
| 1123.6827 | 1155.5823 | 1168.6043 |
| 1208.5116 | 1220.9580 | 1234.5530 |
| 1242.8559 | 1251.9402 | 1264.1179 |
| 1273.3909 | 1282.9566 | 1295.7567 |

|           |           |           |
|-----------|-----------|-----------|
| 1304.7774 | 1316.2739 | 1323.8018 |
| 1334.1457 | 1338.1804 | 1342.2038 |
| 1343.3461 | 1346.9453 | 1351.9387 |
| 1355.6218 | 1357.1095 | 1360.0482 |
| 1364.2884 | 1365.4121 | 1367.4246 |
| 1384.6752 | 1402.1604 | 1417.3385 |
| 1428.5976 | 1436.1895 | 1439.6206 |
| 1440.4394 | 1441.3948 | 1441.4637 |
| 1445.8863 | 1446.9273 | 1513.0544 |
| 1513.1500 | 1515.3146 | 1515.5755 |
| 1516.1898 | 1516.4726 | 1519.0985 |
| 1519.3990 | 1522.1255 | 1522.2696 |
| 1524.9566 | 1526.2313 | 1527.4989 |
| 1528.8716 | 1530.8685 | 1533.7632 |
| 1536.3548 | 1538.3293 | 1539.5036 |
| 1540.7421 | 3029.1693 | 3029.6335 |
| 3029.8289 | 3030.0663 | 3030.9548 |
| 3031.9369 | 3032.6832 | 3033.6595 |
| 3034.4011 | 3034.7031 | 3036.3509 |
| 3039.6064 | 3042.0956 | 3044.0156 |
| 3046.0597 | 3047.2582 | 3053.3034 |
| 3053.4630 | 3054.7647 | 3056.4639 |
| 3057.4776 | 3058.7856 | 3060.4852 |
| 3063.5896 | 3067.5160 | 3070.9717 |
| 3075.3666 | 3080.5406 | 3085.0538 |
| 3088.9346 | 3092.4906 | 3096.3929 |
| 3099.3733 | 3101.2581 | 3120.9454 |
| 3124.7365 | 3132.9066 | 3139.3580 |

#### F-n-Octane

|   |           |           |           |
|---|-----------|-----------|-----------|
| C | 0.000000  | 0.000000  | 0.000000  |
| C | 0.000000  | 0.000000  | 1.528398  |
| C | 1.408165  | 0.000000  | 2.124355  |
| C | 1.419740  | -0.002345 | 3.653073  |
| C | 2.827829  | 0.002113  | 4.248656  |
| C | 2.838711  | -0.007220 | 5.777230  |
| C | 4.246561  | -0.005048 | 6.373964  |
| C | 4.245637  | -0.011872 | 7.902257  |
| H | -1.019432 | 0.001689  | -0.401156 |
| H | 0.513517  | -0.885726 | -0.393037 |
| H | 0.516058  | 0.884268  | -0.393186 |
| H | -0.547569 | -0.878824 | 1.895836  |
| H | -0.547238 | 0.879061  | 1.895652  |
| H | 1.957657  | -0.878392 | 1.754937  |
| H | 1.956084  | 0.880493  | 1.757608  |
| H | 0.873693  | -0.884389 | 4.018668  |
| H | 0.867487  | 0.874526  | 4.021723  |
| H | 3.381900  | -0.872142 | 3.876623  |
| H | 3.372337  | 0.886704  | 3.886974  |
| H | 2.285968  | 0.867680  | 6.150053  |
| H | 2.293296  | -0.891117 | 6.139549  |
| H | 4.797533  | -0.880292 | 6.002954  |

|   |          |           |          |
|---|----------|-----------|----------|
| H | 4.791218 | 0.877483  | 6.011048 |
| H | 3.732233 | 0.872353  | 8.298825 |
| H | 3.728643 | -0.897627 | 8.290707 |
| H | 5.264878 | -0.015777 | 8.303789 |

|           |           |           |
|-----------|-----------|-----------|
| 44.4749   | 59.9495   | 79.5780   |
| 108.8108  | 133.5968  | 158.3386  |
| 199.9257  | 247.2128  | 249.9631  |
| 279.9484  | 346.5712  | 480.3880  |
| 482.7093  | 738.1716  | 742.0095  |
| 764.8281  | 818.7414  | 895.9397  |
| 908.8258  | 925.0587  | 978.4395  |
| 1028.0344 | 1041.6756 | 1051.4005 |
| 1082.3038 | 1092.8215 | 1095.3579 |
| 1119.9635 | 1174.9690 | 1219.8146 |
| 1250.0340 | 1266.7450 | 1297.3723 |
| 1320.0000 | 1337.3778 | 1342.6749 |
| 1358.9427 | 1361.0961 | 1370.4763 |
| 1411.4100 | 1435.8480 | 1440.6790 |
| 1443.8388 | 1445.3616 | 1514.4710 |
| 1514.7877 | 1519.5890 | 1520.6101 |
| 1525.6418 | 1529.8032 | 1529.9140 |
| 1531.5058 | 1536.7109 | 1539.3807 |
| 3028.9776 | 3030.2973 | 3031.8736 |
| 3037.3085 | 3045.6553 | 3046.7960 |
| 3054.3518 | 3055.0284 | 3055.3185 |
| 3058.7699 | 3068.2001 | 3079.9758 |
| 3089.8712 | 3096.9885 | 3128.3649 |
| 3128.5510 | 3132.7105 | 3133.0722 |
